# Supplementary material
Source: publisher figshare collection journal article supplement (https://acs.figshare.com/ndownloader/files/5670072)
Supplement: Supplementary file 1 [file 5670072]

# Bioconjugate Chemistry

Bioconjugate Chem., 1997, 8(1), 31-37, DOI: [10.1021/bc960070o](https://doi.org/10.1021/bc960070o)

## Terms & Conditions

Electronic Supporting Information files are available without a subscription to ACS Web Editions. The American Chemical Society holds a copyright ownership interest in any copyrightable Supporting Information. Files available from the ACS website may be downloaded for personal use only. Users are not otherwise permitted to reproduce, republish, redistribute, or sell any Supporting Information from the ACS website, either in whole or in part, in either machine-readable form or any other form without permission from the American Chemical Society. For permission to reproduce, republish and redistribute this material, requesters must process their own requests via the RightsLink permission system. Information about how to use the RightsLink permission system can be found at

<http://pubs.acs.org/page/copyright/permissions.html>

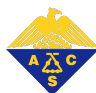

ACS Publications

MOST TRUSTED. MOST CITED. MOST READ.

Copyright © 1997 American Chemical Society

## Supporting Material

### Electrochemistry of Methylene Blue bound to a DNA-Modified Electrode

Shana O. Kelley and Jacqueline K. Barton\*

Beckman Institute, Division of Chemistry and Chemical Engineering,  
California Institute of Technology, Pasadena, CA 91125

Nicole M. Jackson and Michael G. Hill\*

Department of Chemistry,  
Occidental College, Los Angeles, CA 90041

\* to whom correspondence should be addressed.

RECEIVED

OCT 18 1995

#### Figure Captions

(S1) Plot of  $E-E_{pc}$  vs.  $\log(v/k^0)$ ; comparison of theoretical curve (line, ref. 29) to data for 0.1  $\mu\text{M}$  methylene blue at a gold electrode derivatized with 5'SH-(CH<sub>2</sub>)<sub>6</sub>-p-AGTACAGTCATCGCG 3' hybridized to its complement (filled triangles) in 25 mM phosphate, 75 mM NaCl, pH=7. The fit yields a value of  $k^0$  equal to 60(5) s<sup>-1</sup>. We note that the formalism described in reference 29 is based on Marcus theory and was derived for redox-active species immobilized on electrode surfaces. In our case, the strong adsorption of MB to DNA in both its oxidized and reduced states, and the adherence to a Langmuir isotherm ensure that electron-transfer is not diffusion controlled (see ref. 30). Additionally, this treatment assumes symmetric cathodic and anodic shifts about the reduction potential (a transfer coefficient,  $\alpha$ , of 0.5, within the Butler-Volmer formalism); this condition appears to hold for MB reduction at our DNA-modified electrodes. Additionally, in aqueous solution at pH

7, MB undergoes a  $2e^-$ ,  $1H^+$  transfer *via* an ECE mechanism (25). Previous work has shown that the follow-up reactions are fast, and we have assumed this to hold for our system. Spectroelectrochemical experiments show isobestic conversion between the oxidized and doubly reduced states. Therefore, we have treated this system assuming a  $2e^-$  transfer.

(S2) Cyclic voltammograms of 0.1 mM MB at a octadecanethiol-modified electrode. (B)

Plots of  $i_{pc}$  and  $i_{pa}$  versus scan rate<sup>1/2</sup>.

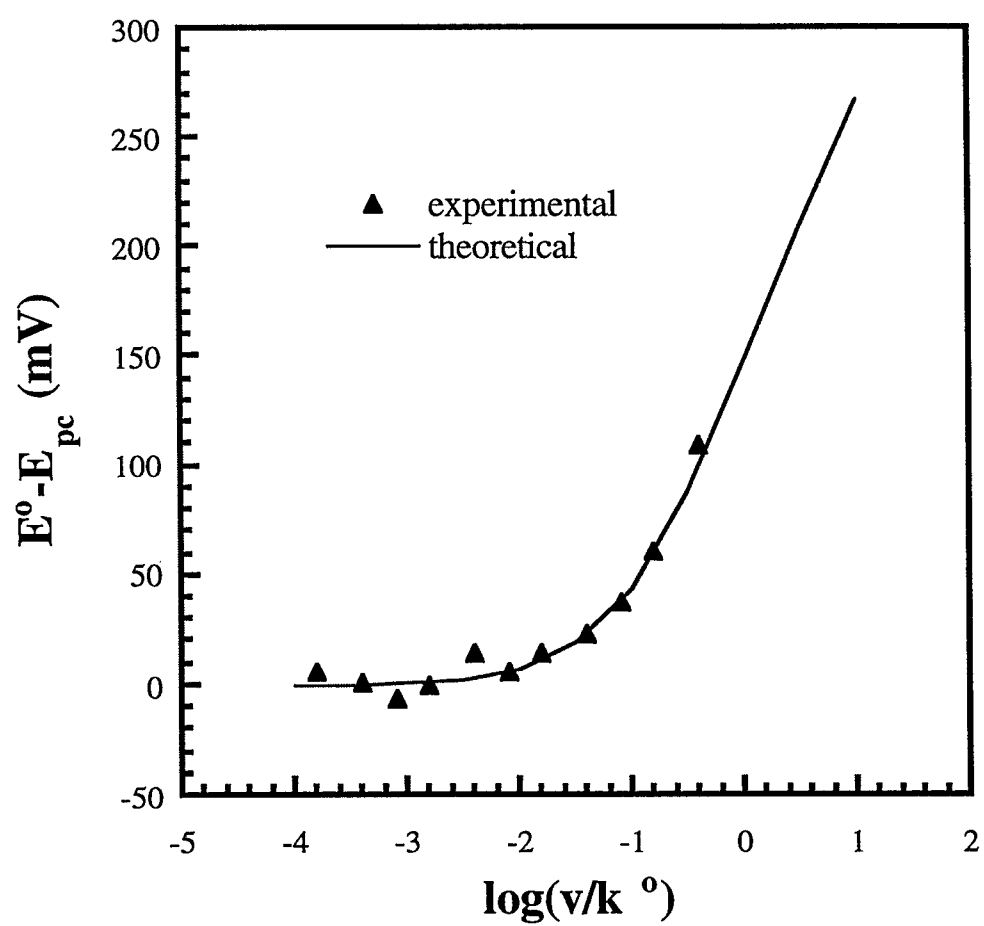

Figure S1

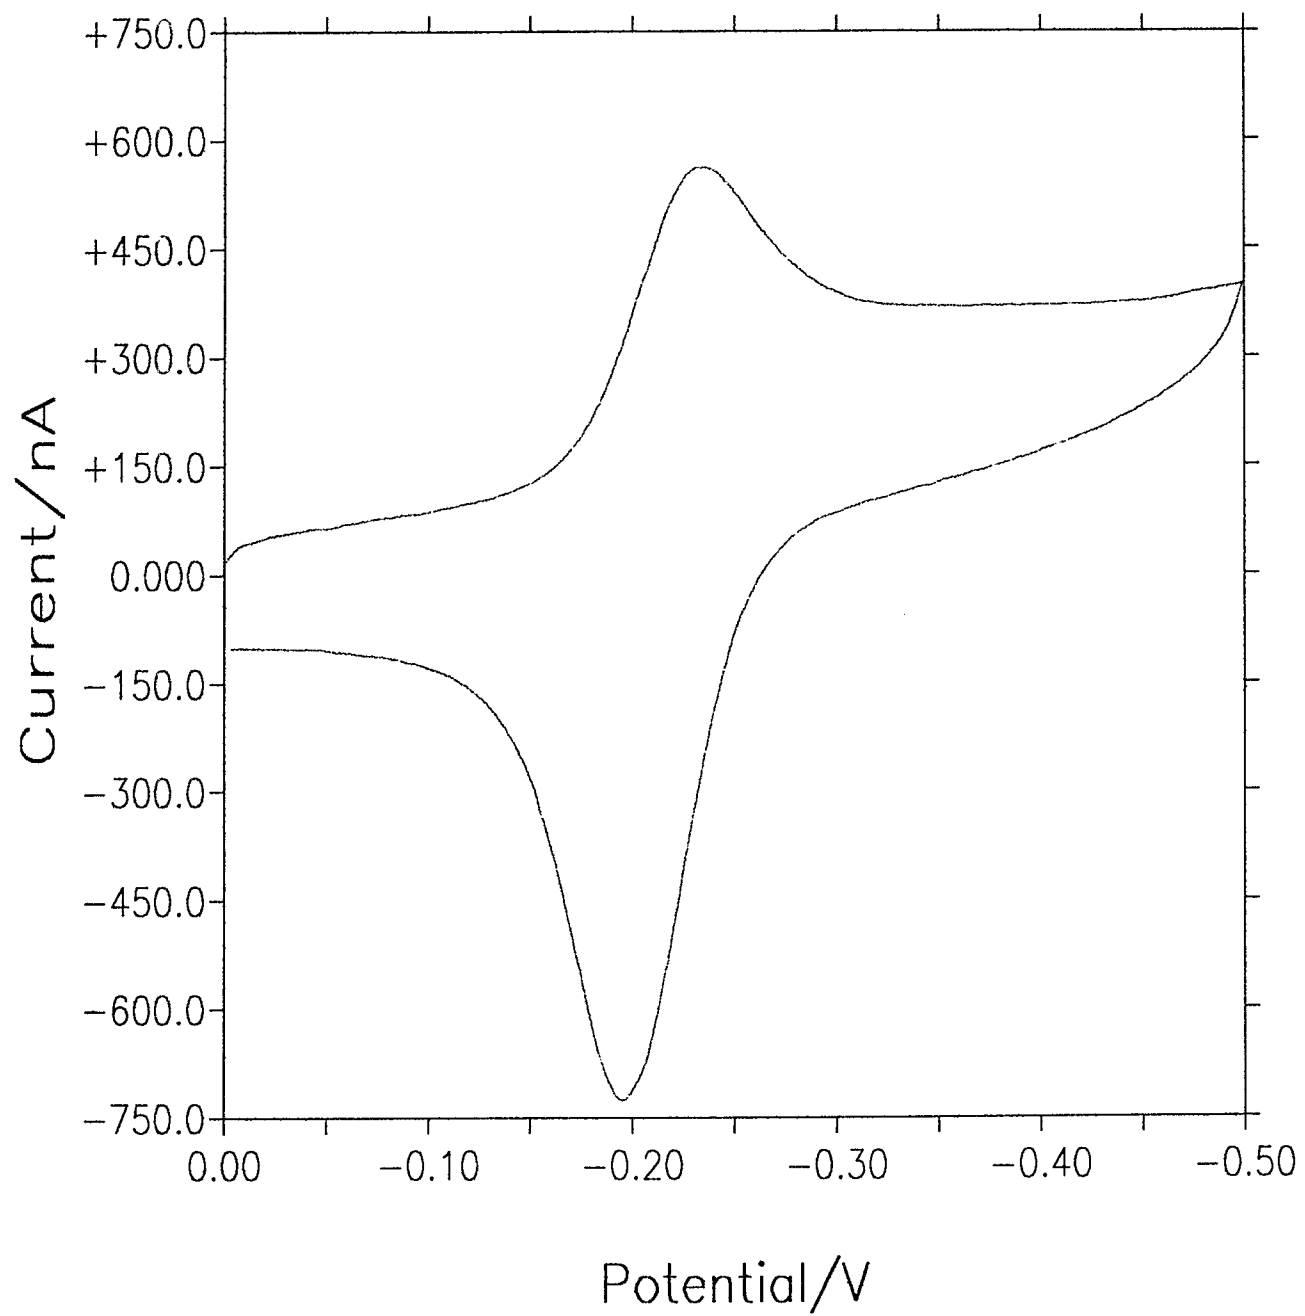

Figure S2A

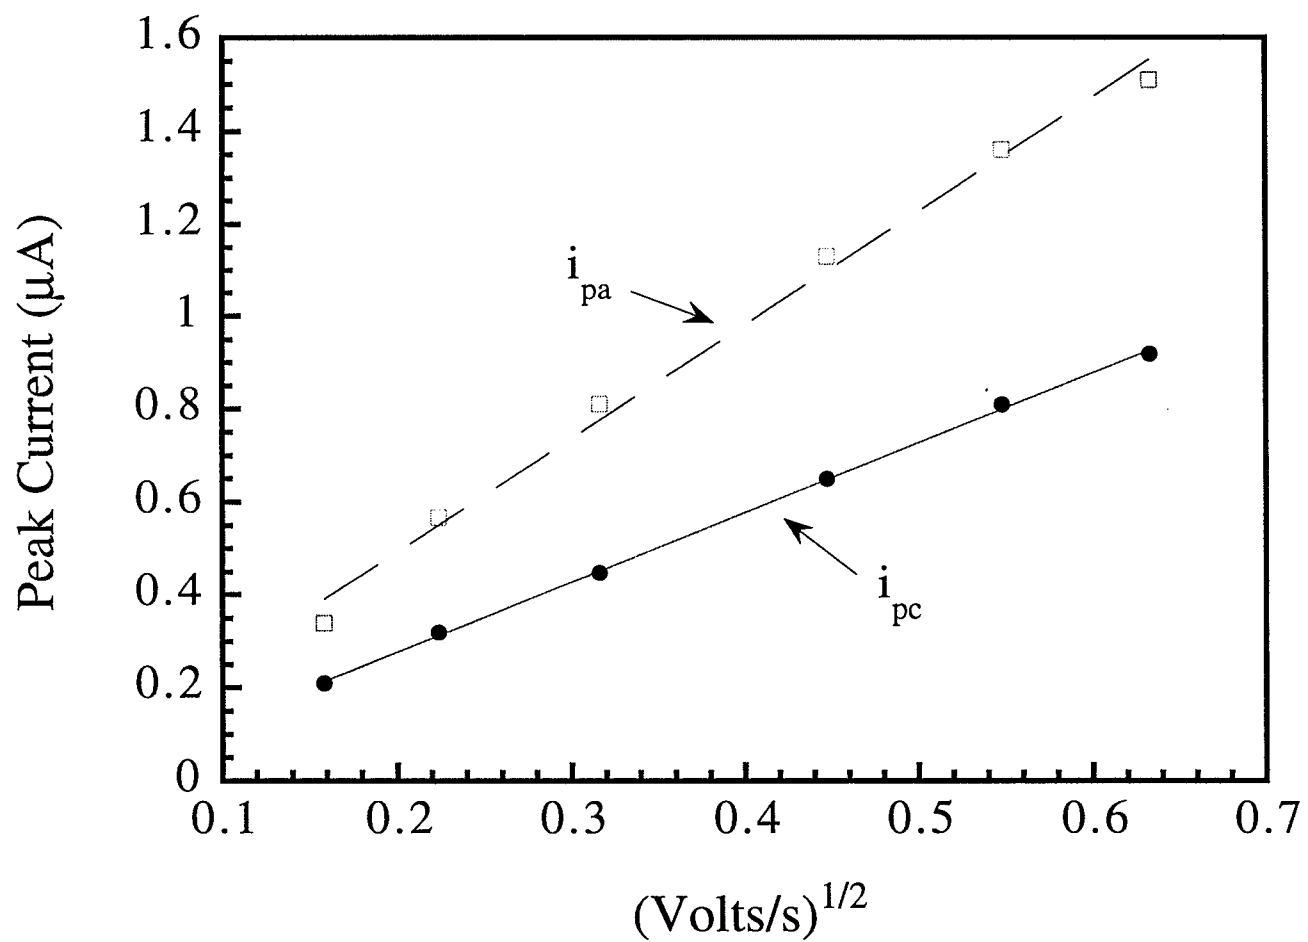

Figure S2B
